# Supplementary material for: Translation into modern standard Arabic, cross-cultural adaptation and psychometric properties’ evaluation of the Lower Extremity Functional Scale (LEFS) in Arabic-speaking athletes with Anterior Cruciate Ligament (ACL) injury
Source: PLoS One. 2019 Jun 10;14(6):e0217791. doi: 10.1371/journal.pone.0217791 (PMC6557503; doi:10.1371/journal.pone.0217791)
Supplement: S2 File — (XLSX) [file pone.0217791.s002.xlsx]

## Sheet: Mean scores and group
Total LEFS pre	Total LEFS post	Group
22	7	1
63	57	1
14	15	1
51	58	1
56	59	1
6	3	1
4	8	1
3	7	1
31	29	1
44	51	1
10	12	1
50	46	1
69	73	1
74	76	1
78	79	1
64	69	1
51	60	1
27	42	1
37	36	1
64	68	1
67	67	1
66	69	1
45	45	1
21	29	1
59	66	1
72	72	1
21	23	1
3	8	1
20	13	1
33	48	1
13	11	1
72	72	1
66	64	1
37	42	1
71	71	1
72	73	1
36	37	1
60	80	1
78	79	1
74	75	1
67	71	1
77	78	1
66	65	1
76	79	1
80	80	1
75	78	1
32	32	1
53	52	1
53	60	1
6	11	1
9	6	1
28	30	1
70	73	1
65	62	1
24	25	1
46	49	1
75	73	1
5	7	1
15	16	1
47	53	1
71	74	1
26	21	1
35	26	1
55	55	1
28	32	1
56	55	1
62	61	1
76	77	1
63	67	1
58	61	1
79	80	1
52	56	1
57	59	1
51	50	1
25	22	1
79	79	1
22	20	1
30	28	1
62	64	1
58	58	1
74	77	1
37	38	1
13	11	1
8	10	1
58	60	1
73	75	1
79	79	1
47	48	1
72	72	1
49	43	1
36	43	1
48	46	1
31	25	1
34	31	1
49	49	1
72	74	1
72	75	1
49	51	1
76	76	1
78	79	1
66	65	1
65	67	1
39	35	1
20	25	1
59	56	1
63	67	1
80	80	1
74	77	1
68	69	1
78	77	1
36	46	1
58	60	1
32	38	1
61	74	1
73	76	1
77	78	1
75	76	1
24	13	1
77	77	1
76	76	1
52	55	1
51	52	1
49	57	1
63	62	1
71	71	1
42	38	1
46	37	1
43	49	1
72	72	1
40	43	1
20	25	1
73	76	1
48	46	1
50	51	1
60	59	1
40	54	1
61	65	1
58	60	1
50	57	1
65	65	1
40	38	1
50	53	1
57	59	1
63	62	1
62	68	1
48	48	1
56	61	1
67	71	1
30	24	1
33	30	1
69	71	1
78	77	2
78	78	2
80	80	2
72	67	2
76	73	2
80	78	2
80	80	2
75	77	2
80	80	2
80	79	2
80	80	2
77	75	2
80	80	2
78	78	2
80	80	2
78	76	2
76	72	2
80	80	2
78	78	2
80	80	2
80	80	3
79	79	3
80	80	3
80	80	3
80	80	3
80	80	3
80	80	3
80	80	3
80	80	3
80	80	3
80	80	3
80	80	3
80	80	3
79	80	3
80	80	3
80	80	3
75	75	3
80	80	3
80	80	3
80	80	3
80	80	3
80	80	3
75	75	3
76	77	3
80	80	3
80	80	3
80	80	3
80	80	3
80	80	3
79	79	3
79	80	3
74	80	3
76	80	3
80	80	3
80	80	3
73	73	3
79	79	3
80	80	3
79	79	3
75	76	3
76	76	3
72	72	3
75	75	3
80	80	3
80	80	3
78	78	3

## Sheet: Test-Retest Reliability
Total PRE	Total Post	Total Pre ACL	Total Post ACL	Total Pre Healthy	Total Post Healthy	Total Pre At Risk	Total Post At Risk
22	7	22	7	78	77	80	80
63	57	63	57	78	78	79	79
14	15	14	15	80	80	80	80
51	58	51	58	72	67	80	80
56	59	56	59	76	73	80	80
6	3	6	3	80	78	80	80
4	8	4	8	80	80	80	80
3	7	3	7	75	77	80	80
31	29	31	29	80	80	80	80
44	51	44	51	80	79	80	80
10	12	10	12	80	80	80	80
50	46	50	46	77	75	80	80
69	73	69	73	80	80	80	80
74	76	74	76	78	78	79	80
78	79	78	79	80	80	80	80
64	69	64	69	78	76	80	80
51	60	51	60	76	72	75	75
27	42	27	42	80	80	80	80
37	36	37	36	78	78	80	80
64	68	64	68	80	80	80	80
67	67	67	67			80	80
66	69	66	69			80	80
45	45	45	45			75	75
21	29	21	29			76	77
59	66	59	66			80	80
72	72	72	72			80	80
21	23	21	23			80	80
3	8	3	8			80	80
20	13	20	13			80	80
33	48	33	48			79	79
13	11	13	11			79	80
72	72	72	72			74	80
66	64	66	64			76	80
37	42	37	42			80	80
71	71	71	71			80	80
72	73	72	73			73	73
36	37	36	37			79	79
60	80	60	80			80	80
78	79	78	79			79	79
74	75	74	75			75	76
67	71	67	71			76	76
77	78	77	78			72	72
66	65	66	65			75	75
76	79	76	79			80	80
80	80	80	80			80	80
75	78	75	78			78	78
32	32	32	32
53	52	53	52
53	60	53	60
6	11	6	11
9	6	9	6
28	30	28	30
70	73	70	73
65	62	65	62
24	25	24	25
46	49	46	49
75	73	75	73
5	7	5	7
15	16	15	16
47	53	47	53
71	74	71	74
26	21	26	21
35	26	35	26
55	55	55	55
28	32	28	32
56	55	56	55
62	61	62	61
76	77	76	77
63	67	63	67
58	61	58	61
79	80	79	80
52	56	52	56
57	59	57	59
51	50	51	50
25	22	25	22
79	79	79	79
22	20	22	20
30	28	30	28
62	64	62	64
58	58	58	58
74	77	74	77
37	38	37	38
13	11	13	11
8	10	8	10
58	60	58	60
73	75	73	75
79	79	79	79
47	48	47	48
72	72	72	72
49	43	49	43
36	43	36	43
48	46	48	46
31	25	31	25
34	31	34	31
49	49	49	49
72	74	72	74
72	75	72	75
49	51	49	51
76	76	76	76
78	79	78	79
66	65	66	65
65	67	65	67
39	35	39	35
20	25	20	25
59	56	59	56
63	67	63	67
80	80	80	80
74	77	74	77
68	69	68	69
78	77	78	77
36	46	36	46
58	60	58	60
32	38	32	38
61	74	61	74
73	76	73	76
77	78	77	78
75	76	75	76
24	13	24	13
77	77	77	77
76	76	76	76
52	55	52	55
51	52	51	52
49	57	49	57
63	62	63	62
71	71	71	71
42	38	42	38
46	37	46	37
43	49	43	49
72	72	72	72
40	43	40	43
20	25	20	25
73	76	73	76
48	46	48	46
50	51	50	51
60	59	60	59
40	54	40	54
61	65	61	65
58	60	58	60
50	57	50	57
65	65	65	65
40	38	40	38
50	53	50	53
57	59	57	59
63	62	63	62
62	68	62	68
48	48	48	48
56	61	56	61
67	71	67	71
30	24	30	24
33	30	33	30
69	71	69	71
78	77
78	78
80	80
72	67
76	73
80	78
80	80
75	77
80	80
80	79
80	80
77	75
80	80
78	78
80	80
78	76
76	72
80	80
78	78
80	80
80	80
79	79
80	80
80	80
80	80
80	80
80	80
80	80
80	80
80	80
80	80
80	80
80	80
79	80
80	80
80	80
75	75
80	80
80	80
80	80
80	80
80	80
75	75
76	77
80	80
80	80
80	80
80	80
80	80
79	79
79	80
74	80
76	80
80	80
80	80
73	73
79	79
80	80
79	79
75	76
76	76
72	72
75	75
80	80
80	80
78	78

## Sheet: Responsiveness
First score	Third score	Mean difference
40	71	31
34	39	5
11	56	45
76	78	2
69	70	1
70	79	9
22	30	8
58	73	15
49	70	21
48	49	1
76	78	2
44	50	6
76	79	3
74	80	6
68	76	8
58	67	9
61	78	17
49	63	14
71	75	4
55	74	19
43	54	11
35	44	9
31	61	30
29	45	16
40	65	25
63	74	11
10	62	52
28	56	28
75	79	4
47	72	25
70	72	2
17	39	22
25	40	15
50	59	9
76	78	2
73	77	4
12	43	31
70	74	4
40	69	29
20	71	51
57	63	6
39	60	21
74	76	2
32	56	24
52	62	10
58	68	10
56	57	1
22	38	16
77	77	0
62	76	14
5	31	26
39	57	18
43	64	21
34	51	17
32	41	9
52	60	8
40	71	31
34	39	5
76	78	2
69	70	1
70	79	9
58	73	15
49	70	21
48	49	1
76	78	2
44	50	6
76	79	3
74	80	6
68	76	8
58	67	9
61	78	17
51	55	4
55	74	19
43	54	11
35	44	9
31	61	30
40	65	25
63	74	11

## Sheet: ROC
Mean change score	Anchor-change in rehab group
31	1
45	1
2	0
1	1
9	0
8	1
15	1
21	1
1	0
2	0
6	1
3	0
6	0
8	0
9	1
17	0
4	0
4	0
19	0
11	1
9	0
30	1
16	1
25	1
11	1
52	1
28	0
4	0
25	1
2	0
22	0
15	1
9	0
2	0
4	1
31	1
4	0
29	0
51	1
6	0
21	1
2	0
24	1
10	1
10	1
1	0
16	1
0	0
14	0
26	1
18	1
21	1
17	1
9	1
8	1
31	1
2	0
1	1
9	0
15	1
-10	0
21	1
1	0
2	0
6	1
3	0
6	0
8	0
9	1
17	0
4	0
19	0
11	1
9	0
-4	1
30	1
25	1
11	1

## Sheet: Longotudinal reproducibility
First score	Second score
56	55
63	67
52	56
30	28
74	77
79	79
72	72
48	46
72	74
78	79
65	67
78	77
77	78
51	52
63	62
72	72
50	51
61	65
65	65
63	62

## Sheet: Factor Analysis
LEFSQ1	LEFSQ2	LEFSQ3	LEFSQ4	LEFSQ5	LEFSQ6	LEFSQ7	LEFSQ8	LEFSQ9	LEFSQ10	LEFSQ11	LEFSQ12	LEFSQ13	LEFSQ14	LEFSQ15	LEFSQ16	LEFSQ17	LEFSQ18	LEFSQ19	LEFSQ20	Total PRE score
1	2	0	3	0	0	0	2	3	3	2	1	2	0	1	0	0	0	0	2	22
4	3	2	4	4	3	4	4	3	4	4	3	3	3	4	3	2	1	1	4	63
1	0	0	4	1	0	0	0	0	1	3	3	1	0	0	0	0	0	0	0	14
4	1	1	4	0	1	4	4	2	2	4	3	2	2	4	2	1	3	3	4	51
4	1	1	4	2	3	4	4	1	2	4	3	3	2	4	4	4	0	3	3	56
1	0	0	2	0	0	1	0	0	1	0	0	1	0	0	0	0	0	0	0	6
0	0	0	2	0	0	0	0	0	1	0	0	1	0	0	0	0	0	0	0	4
0	0	1	0	0	0	0	0	1	0	0	0	0	0	1	0	0	0	0	0	3
2	0	0	3	0	1	4	3	2	2	3	2	1	1	3	1	1	1	0	1	31
3	2	0	4	0	4	4	4	4	4	3	1	3	2	2	1	0	0	0	3	44
1	0	0	1	0	0	1	2	0	1	1	0	1	0	1	0	0	0	0	1	10
4	1	2	4	0	4	4	4	3	3	4	3	3	3	3	0	0	0	1	4	50
4	2	4	4	2	4	4	4	4	4	4	4	4	4	4	3	2	2	2	4	69
4	4	3	4	4	3	4	4	4	4	4	4	4	4	4	4	3	3	2	4	74
4	4	4	4	3	4	4	4	4	4	4	4	4	4	4	4	4	3	4	4	78
4	1	4	4	4	3	4	4	2	4	4	3	4	2	3	2	2	2	4	4	64
4	0	2	4	0	3	4	4	4	2	4	3	4	4	4	2	0	0	0	3	51
2	1	0	2	0	1	2	2	1	1	2	1	2	1	2	2	1	1	1	2	27
2	0	0	4	1	3	4	2	1	3	3	2	3	0	3	0	0	0	3	3	37
4	2	2	4	2	1	4	4	4	4	4	4	2	2	1	4	4	4	4	4	64
4	2	3	4	3	4	4	4	3	4	4	4	4	4	4	3	3	2	0	4	67
3	3	3	3	1	4	4	3	3	4	3	3	4	2	4	4	4	3	4	4	66
2	2	2	4	0	1	3	3	2	4	4	3	3	2	3	2	1	0	0	4	45
2	0	0	2	0	2	2	3	0	2	3	1	2	0	1	0	0	0	0	1	21
4	2	2	4	1	4	4	4	4	2	4	4	4	2	4	4	2	0	0	4	59
4	4	1	4	0	4	4	4	4	4	4	4	4	4	4	4	4	3	4	4	72
2	0	0	2	0	0	1	1	0	2	3	2	2	2	2	0	0	0	0	2	21
0	0	0	0	0	0	0	0	0	0	0	0	0	1	2	0	0	0	0	0	3
1	1	0	4	0	1	3	2	0	3	0	0	2	0	1	0	1	0	0	1	20
4	3	2	4	0	1	2	2	3	2	3	1	4	0	0	0	0	0	1	1	33
0	0	0	2	0	2	0	2	0	2	2	0	1	0	1	0	0	0	0	1	13
4	3	4	4	4	4	4	4	4	4	3	4	4	3	3	4	3	2	3	4	72
4	1	4	4	4	4	4	4	3	4	4	4	4	3	3	3	2	1	2	4	66
2	1	1	3	0	2	2	3	2	3	3	2	2	2	3	2	0	0	0	4	37
4	3	3	4	0	4	4	4	4	3	4	4	4	3	3	4	4	4	4	4	71
4	4	4	3	3	3	3	4	4	4	3	3	4	3	4	4	4	3	4	4	72
4	2	0	0	0	2	2	2	0	2	1	1	1	1	4	2	0	4	4	4	36
3	3	3	3	3	3	3	3	3	3	3	3	3	3	3	3	3	3	3	3	60
4	4	3	4	3	4	4	4	4	4	4	4	4	4	4	4	4	4	4	4	78
4	4	3	4	4	4	4	4	4	4	4	4	3	3	4	4	3	3	3	4	74
4	2	4	4	3	3	4	4	4	4	4	4	4	4	4	4	4	1	1	1	67
4	4	3	4	3	4	4	4	4	4	4	4	4	3	4	4	4	4	4	4	77
4	3	3	4	4	4	4	4	3	4	4	4	4	3	2	3	3	1	1	4	66
4	3	3	4	3	4	4	4	4	4	4	4	4	4	4	4	4	3	4	4	76
4	4	4	4	4	4	4	4	4	4	4	4	4	4	4	4	4	4	4	4	80
4	4	3	3	3	4	4	4	4	4	3	4	4	3	4	4	4	4	4	4	75
3	2	0	3	1	2	3	2	1	3	2	1	3	2	1	0	0	0	0	3	32
2	2	1	3	2	2	3	3	1	2	3	4	3	4	2	4	4	4	3	1	53
3	1	1	4	1	3	3	4	3	3	4	4	3	4	4	2	1	0	1	4	53
0	0	0	1	0	0	1	0	0	1	1	0	1	0	0	0	0	0	0	1	6
1	1	0	2	0	0	1	1	0	1	1	0	0	0	0	0	0	0	0	1	9
2	0	0	3	0	0	1	4	3	2	2	1	4	2	2	0	0	0	0	2	28
3	3	3	3	4	4	4	4	3	4	4	4	4	4	3	3	3	3	3	4	70
4	3	4	4	2	4	4	4	4	4	4	4	4	3	4	2	1	1	1	4	65
3	1	0	4	0	1	2	2	1	1	2	1	1	1	2	1	0	0	0	1	24
4	0	0	4	0	3	3	4	4	4	4	3	3	3	4	0	0	0	0	3	46
4	3	3	4	4	4	4	4	4	4	4	4	4	4	4	4	3	3	3	4	75
0	2	1	0	1	0	0	0	0	0	0	0	0	0	0	0	0	1	0	0	5
0	0	0	0	3	0	0	0	1	0	0	0	0	1	0	3	3	3	1	0	15
3	2	1	4	1	3	3	4	2	4	0	1	1	1	2	4	2	4	4	1	47
4	4	3	4	3	3	4	4	3	4	4	4	4	4	4	3	3	3	2	4	71
2	0	0	4	0	0	2	2	1	3	4	1	2	1	2	0	0	0	0	2	26
3	3	1	2	0	2	3	4	0	2	2	2	1	2	4	0	0	0	0	4	35
4	1	1	3	1	0	4	4	3	4	4	4	4	3	4	3	2	1	2	3	55
3	0	0	4	0	2	2	3	1	2	4	2	2	1	2	0	0	0	0	0	28
3	1	1	4	3	4	4	4	3	4	4	3	4	2	3	2	1	1	1	4	56
4	3	2	4	0	4	4	4	4	4	4	4	4	4	4	2	1	0	2	4	62
4	4	4	4	4	3	4	4	4	4	4	4	4	3	3	4	4	4	3	4	76
4	2	2	4	3	4	4	4	4	4	4	4	4	4	4	2	2	1	0	3	63
3	2	2	4	2	4	4	4	3	4	4	4	4	4	4	1	1	1	0	3	58
4	4	4	4	4	4	4	4	4	4	4	4	4	4	4	4	4	4	3	4	79
3	2	1	4	1	3	4	4	2	4	4	4	4	4	4	0	0	0	0	4	52
4	4	2	4	2	4	4	4	3	4	4	2	4	4	4	0	0	0	0	4	57
3	1	3	4	1	4	4	3	3	4	4	3	3	3	4	0	0	0	0	4	51
2	0	0	2	0	1	2	3	2	1	2	2	2	2	2	0	0	0	1	1	25
4	4	4	4	3	4	4	4	4	4	4	4	4	4	4	4	4	4	4	4	79
0	0	2	3	0	4	4	2	0	2	0	0	0	0	2	0	0	0	2	1	22
2	2	3	3	2	3	4	3	0	2	0	0	0	0	2	0	0	0	0	4	30
4	1	4	4	3	1	4	4	3	4	3	2	2	3	4	3	2	4	3	4	62
4	4	4	4	3	4	4	4	3	4	4	4	0	4	4	0	0	0	0	4	58
4	4	2	4	4	4	4	4	4	4	4	4	4	4	3	4	2	3	4	4	74
2	3	2	3	1	1	1	3	2	3	1	2	1	1	2	2	1	2	1	3	37
1	0	0	2	0	2	2	2	0	1	1	0	1	0	0	0	0	0	0	1	13
0	0	0	1	0	0	1	1	0	1	1	1	0	0	1	0	0	0	1	0	8
3	1	0	4	1	4	4	4	4	4	4	4	4	4	3	2	2	0	2	4	58
3	1	4	4	2	4	4	4	3	4	4	4	4	4	4	4	4	4	4	4	73
4	3	4	4	4	4	4	4	4	4	4	4	4	4	4	4	4	4	4	4	79
3	0	4	4	3	3	4	4	0	4	3	3	4	1	4	0	0	0	0	3	47
4	3	4	4	4	4	4	4	4	4	4	4	4	3	4	4	2	1	3	4	72
2	4	3	4	3	4	4	3	3	2	3	2	3	1	1	1	1	1	1	3	49
3	0	0	4	0	1	4	4	1	4	4	1	2	1	2	1	1	0	1	2	36
4	1	2	4	2	2	4	4	1	4	4	1	3	1	3	2	1	0	1	4	48
3	0	0	4	0	0	4	1	1	2	4	1	3	2	3	0	0	0	0	3	31
2	4	3	2	1	1	1	2	1	1	1	2	2	1	1	2	2	1	2	2	34
3	1	0	4	1	4	4	3	2	4	4	3	4	3	4	1	0	0	0	4	49
4	3	3	4	2	4	4	4	3	4	4	4	4	4	4	4	3	3	3	4	72
4	4	3	4	2	4	4	4	4	4	4	4	4	4	4	4	3	2	2	4	72
3	0	2	4	1	4	4	4	2	4	4	2	4	3	4	1	0	0	0	3	49
4	3	3	4	3	4	4	4	4	4	4	4	4	4	4	4	4	3	4	4	76
4	4	4	4	4	4	4	4	3	4	4	4	4	4	4	4	3	4	4	4	78
3	2	3	4	3	2	3	4	3	4	4	3	4	3	4	4	3	3	3	4	66
4	2	4	4	3	3	2	3	2	4	4	3	4	3	4	4	3	2	3	4	65
3	1	2	3	1	3	4	3	1	2	2	1	4	2	4	0	0	0	0	3	39
2	0	0	2	0	1	4	2	0	1	1	0	0	2	4	0	0	0	0	1	20
4	1	0	4	2	3	4	4	3	4	4	4	3	3	4	3	1	3	2	3	59
4	1	4	4	3	4	4	4	4	4	4	4	4	4	4	2	0	0	1	4	63
4	4	4	4	4	4	4	4	4	4	4	4	4	4	4	4	4	4	4	4	80
4	3	3	4	3	3	4	4	4	4	4	4	4	4	4	4	4	3	3	4	74
4	4	4	4	1	3	4	4	3	4	4	4	4	4	4	4	3	0	2	4	68
4	4	4	4	4	4	4	4	4	4	4	4	4	4	4	4	3	3	4	4	78
3	1	0	4	1	3	3	3	1	3	4	2	1	1	2	0	0	0	0	4	36
3	3	2	3	3	3	4	3	3	3	3	4	3	3	3	2	2	2	3	3	58
1	1	1	2	1	1	2	2	1	2	3	2	2	1	2	2	1	1	1	3	32
3	2	2	4	3	2	4	4	2	4	4	4	4	1	3	4	1	3	3	4	61
4	3	4	4	3	4	4	4	4	4	4	4	4	4	4	2	4	2	3	4	73
4	4	4	4	4	4	4	4	4	4	4	4	4	4	4	4	3	3	3	4	77
4	4	3	4	4	4	4	4	4	4	4	4	3	3	3	4	4	3	4	4	75
2	1	0	2	1	3	3	3	2	2	0	0	0	0	3	0	0	0	0	2	24
4	3	4	4	4	4	4	4	4	4	4	4	4	4	4	4	3	3	4	4	77
4	4	4	4	4	4	4	4	4	4	4	3	4	3	4	4	3	3	4	4	76
4	2	2	4	1	2	4	4	3	2	4	3	2	2	2	3	2	1	1	4	52
4	2	3	4	1	1	4	4	4	4	4	4	2	2	2	1	1	0	0	4	51
3	2	1	4	1	1	4	4	2	4	4	3	4	4	4	1	0	0	0	3	49
4	3	4	4	3	4	4	4	4	4	4	4	4	4	4	1	0	0	0	4	63
3	4	3	4	2	4	4	4	3	4	4	4	4	3	3	4	4	3	3	4	71
2	2	3	4	3	1	4	4	2	3	2	1	1	0	2	3	1	0	0	4	42
2	1	1	4	1	2	3	3	3	2	4	3	2	2	4	2	1	1	1	4	46
4	2	1	4	1	2	4	4	2	1	4	2	2	2	2	1	1	1	1	2	43
4	4	3	4	3	4	4	4	4	4	4	4	4	3	3	3	3	3	3	4	72
2	1	3	3	1	2	3	3	2	3	2	1	3	1	2	2	1	1	1	3	40
2	1	0	4	1	4	1	1	0	1	1	0	0	1	1	0	0	0	0	2	20
4	3	3	4	3	3	4	4	4	4	4	4	4	4	3	4	3	3	4	4	73
2	1	4	4	4	2	3	4	2	4	4	2	3	0	4	0	0	0	1	4	48
3	2	4	4	4	2	2	3	1	4	4	1	1	0	4	1	1	1	4	4	50
4	2	4	4	3	3	3	3	3	4	4	4	3	2	4	2	1	1	2	4	60
2	1	1	3	3	2	2	1	1	2	3	2	2	2	3	2	1	2	1	4	40
4	2	3	4	2	4	3	4	3	4	4	2	4	2	4	3	1	2	2	4	61
4	1	4	1	4	4	4	4	4	4	4	4	4	4	4	0	0	0	0	4	58
1	1	0	4	1	3	3	3	3	4	2	2	3	3	4	1	3	3	3	3	50
3	3	2	4	2	3	4	3	3	4	4	4	3	3	4	4	3	2	3	4	65
2	1	1	3	2	2	3	3	1	3	3	2	2	2	4	1	0	0	2	3	40
4	1	2	4	1	3	4	4	3	4	4	2	3	2	3	0	0	0	2	4	50
3	1	0	4	1	4	4	4	2	3	4	4	4	3	3	3	2	2	3	3	57
3	2	1	4	3	4	4	3	2	4	4	3	4	3	3	4	3	3	2	4	63
4	4	4	3	3	2	4	4	2	4	3	2	4	4	4	4	1	0	2	4	62
3	1	4	4	2	3	4	4	2	3	4	2	3	1	4	0	0	0	0	4	48
3	2	2	4	2	4	4	4	2	4	4	2	4	2	4	2	2	0	1	4	56
4	3	2	4	2	4	3	4	2	4	4	3	3	3	4	4	3	4	3	4	67
2	1	2	3	0	1	2	3	1	2	2	0	2	2	4	0	0	0	1	2	30
3	1	2	3	0	2	4	2	2	3	2	1	2	0	3	0	0	0	0	3	33
4	3	3	4	3	4	4	4	3	4	4	4	4	4	4	3	2	2	2	4	69
4	4	4	4	4	4	4	4	4	4	4	4	4	3	4	3	4	4	4	4	78
4	4	2	4	4	4	4	4	4	4	4	4	4	4	4	4	4	4	4	4	78
4	4	4	4	4	4	4	4	4	4	4	4	4	4	4	4	4	4	4	4	80
4	4	4	4	4	3	4	3	3	3	4	4	4	4	3	4	3	4	3	3	72
4	4	3	4	4	4	4	4	4	4	4	4	3	4	4	4	3	4	3	4	76
4	4	4	4	4	4	4	4	4	4	4	4	4	4	4	4	4	4	4	4	80
4	4	4	4	4	4	4	4	4	4	4	4	4	4	4	4	4	4	4	4	80
4	4	4	4	3	4	4	4	3	4	4	3	3	4	4	4	3	4	4	4	75
4	4	4	4	4	4	4	4	4	4	4	4	4	4	4	4	4	4	4	4	80
4	4	4	4	4	4	4	4	4	4	4	4	4	4	4	4	4	4	4	4	80
4	4	4	4	4	4	4	4	4	4	4	4	4	4	4	4	4	4	4	4	80
3	4	4	4	4	3	4	4	3	4	4	4	4	4	4	4	4	4	4	4	77
4	4	4	4	4	4	4	4	4	4	4	4	4	4	4	4	4	4	4	4	80
4	4	3	4	4	3	4	4	4	4	4	4	4	4	4	4	4	4	4	4	78
4	4	4	4	4	4	4	4	4	4	4	4	4	4	4	4	4	4	4	4	80
4	4	4	4	4	4	4	4	4	4	4	4	3	4	4	4	3	4	4	4	78
3	3	4	4	4	3	4	4	4	4	4	4	4	4	4	4	3	4	4	4	76
4	4	4	4	4	4	4	4	4	4	4	4	4	4	4	4	4	4	4	4	80
4	4	2	4	4	4	4	4	4	4	4	4	4	4	4	4	4	4	4	4	78
4	4	4	4	4	4	4	4	4	4	4	4	4	4	4	4	4	4	4	4	80
4	4	4	4	4	4	4	4	4	4	4	4	4	4	4	4	4	4	4	4	80
4	4	3	4	4	4	4	4	4	4	4	4	4	4	4	4	4	4	4	4	79
4	4	4	4	4	4	4	4	4	4	4	4	4	4	4	4	4	4	4	4	80
4	4	4	4	4	4	4	4	4	4	4	4	4	4	4	4	4	4	4	4	80
4	4	4	4	4	4	4	4	4	4	4	4	4	4	4	4	4	4	4	4	80
4	4	4	4	4	4	4	4	4	4	4	4	4	4	4	4	4	4	4	4	80
4	4	4	4	4	4	4	4	4	4	4	4	4	4	4	4	4	4	4	4	80
4	4	4	4	4	4	4	4	4	4	4	4	4	4	4	4	4	4	4	4	80
4	4	4	4	4	4	4	4	4	4	4	4	4	4	4	4	4	4	4	4	80
4	4	4	4	4	4	4	4	4	4	4	4	4	4	4	4	4	4	4	4	80
4	4	4	4	4	4	4	4	4	4	4	4	4	4	4	4	4	4	4	4	80
4	4	4	4	4	4	4	4	4	4	4	4	4	4	4	4	4	4	4	4	80
4	4	4	4	4	4	4	4	4	4	4	4	4	4	4	4	4	4	4	4	80
4	4	4	4	4	4	4	4	4	4	4	4	4	4	4	4	4	4	4	3	79
4	4	4	4	4	4	4	4	4	4	4	4	4	4	4	4	4	4	4	4	80
4	4	4	4	4	4	4	4	4	4	4	4	4	4	4	4	4	4	4	4	80
4	4	1	4	4	2	4	4	4	4	4	4	4	4	4	4	4	4	4	4	75
4	4	4	4	4	4	4	4	4	4	4	4	4	4	4	4	4	4	4	4	80
4	4	4	4	4	4	4	4	4	4	4	4	4	4	4	4	4	4	4	4	80
4	4	4	4	4	4	4	4	4	4	4	4	4	4	4	4	4	4	4	4	80
4	4	4	4	4	4	4	4	4	4	4	4	4	4	4	4	4	4	4	4	80
4	4	4	4	4	4	4	4	4	4	4	4	4	4	4	4	4	4	4	4	80
4	4	2	4	3	4	4	4	4	4	4	4	4	3	3	4	4	4	4	4	75
4	4	3	4	4	3	2	4	4	4	4	4	4	4	4	4	4	4	4	4	76
4	4	4	4	4	4	4	4	4	4	4	4	4	4	4	4	4	4	4	4	80
4	4	4	4	4	4	4	4	4	4	4	4	4	4	4	4	4	4	4	4	80
4	4	4	4	4	4	4	4	4	4	4	4	4	4	4	4	4	4	4	4	80
4	4	4	4	4	4	4	4	4	4	4	4	4	4	4	4	4	4	4	4	80
4	4	4	4	4	4	4	4	4	4	4	4	4	4	4	4	4	4	4	4	80
4	4	3	4	4	4	4	4	4	4	4	4	4	4	4	4	4	4	4	4	79
4	4	3	4	4	4	4	4	4	4	4	4	4	4	4	4	4	4	4	4	79
3	4	2	4	4	4	4	4	4	4	4	4	3	3	4	4	3	4	4	4	74
4	4	4	4	3	4	4	4	4	4	4	4	4	3	3	4	3	4	4	4	76
4	4	4	4	4	4	4	4	4	4	4	4	4	4	4	4	4	4	4	4	80
4	4	4	4	4	4	4	4	4	4	4	4	4	4	4	4	4	4	4	4	80
3	4	1	4	3	3	4	4	4	4	4	4	4	3	4	4	4	4	4	4	73
4	3	4	4	4	4	4	4	4	4	4	4	4	4	4	4	4	4	4	4	79
4	4	4	4	4	4	4	4	4	4	4	4	4	4	4	4	4	4	4	4	80
4	4	4	4	4	4	4	4	4	4	4	4	4	4	4	4	4	3	4	4	79
4	4	3	3	1	4	4	4	4	4	4	4	4	4	4	4	4	4	4	4	75
4	4	2	4	2	4	4	4	4	4	4	4	4	4	4	4	4	4	4	4	76
3	4	2	3	4	2	4	4	4	4	4	4	4	4	4	4	3	4	3	4	72
3	3	4	4	4	4	4	4	4	4	4	3	4	3	3	4	4	4	4	4	75
4	4	4	4	4	4	4	4	4	4	4	4	4	4	4	4	4	4	4	4	80
4	4	4	4	4	4	4	4	4	4	4	4	4	4	4	4	4	4	4	4	80
4	4	4	4	4	4	4	4	4	4	4	4	4	4	4	4	3	3	4	4	78

## Sheet: Convergent Validity
LEFS 1ST	LEFS 2ND	IKDC
22	7	26.43
63	57	54.02
14	15	32.18
51	58	55.17
56	59	45.97
6	3	24.13
4	8	28.73
3	7	22.98
31	29	27.58
44	51	41.37
10	12	22.99
50	46	41.38
69	73	57.47
74	76	67.82
78	79	70.11
64	69	52.87
51	60	48.27
27	42	60.92
37	36	54.02
64	68	58.62
67	67	54.02
66	69	70.11
45	45	44.83
21	29	57.47
59	66	41.38
72	72	71.26
21	23	37.93
3	8	17.24
20	13	44.23
33	48	55.17
13	11	39.08
72	72	65.52
66	64	65.52
37	42	41.38
71	71	68.97
72	73	51.72
36	37	28.74
60	80	82.76
78	79	78.16
74	75	66.67
67	71	67.82
77	78	73.56
66	65	59.77
76	79	71.26
80	80	70.11
75	78	70.11
32	32	48.27
53	52	44.83
53	60	54.02
6	11	27.58
